# Supplementary material
Source: PubMed Central journal article supplement (PMC5943138)

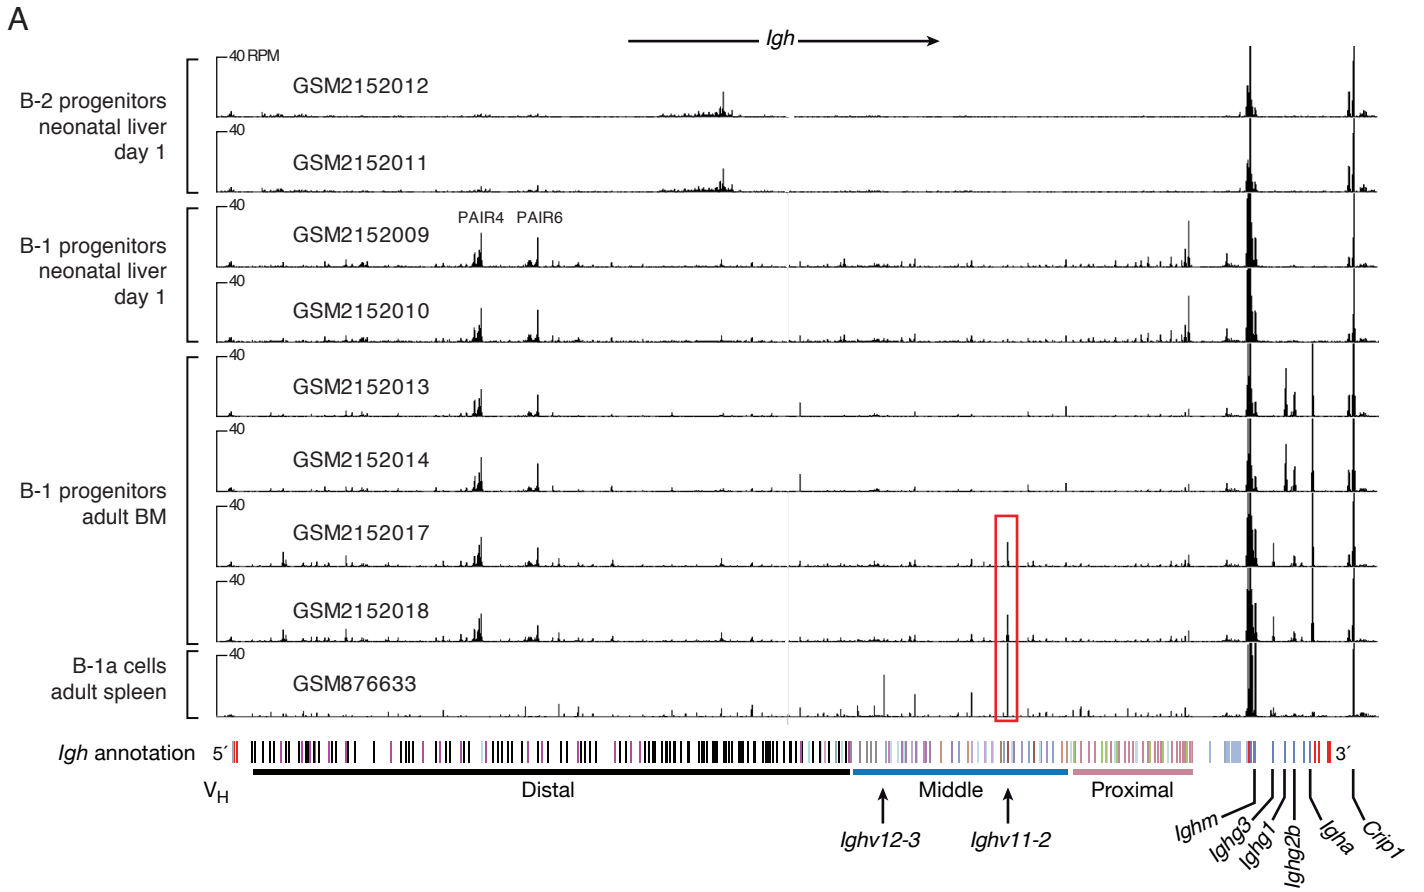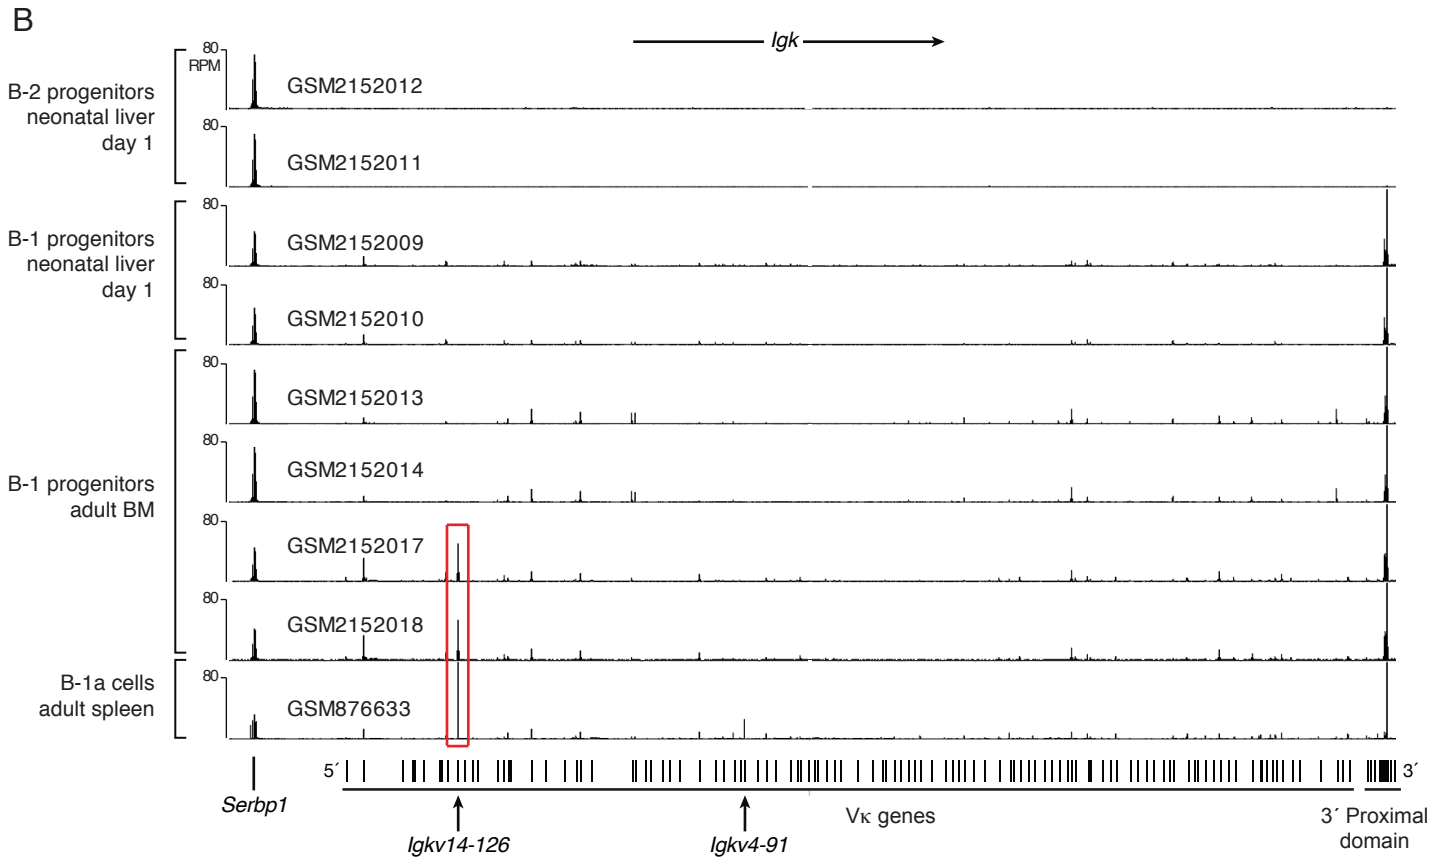

Supplemental Figure 1A,B (Kreslavky et al.)

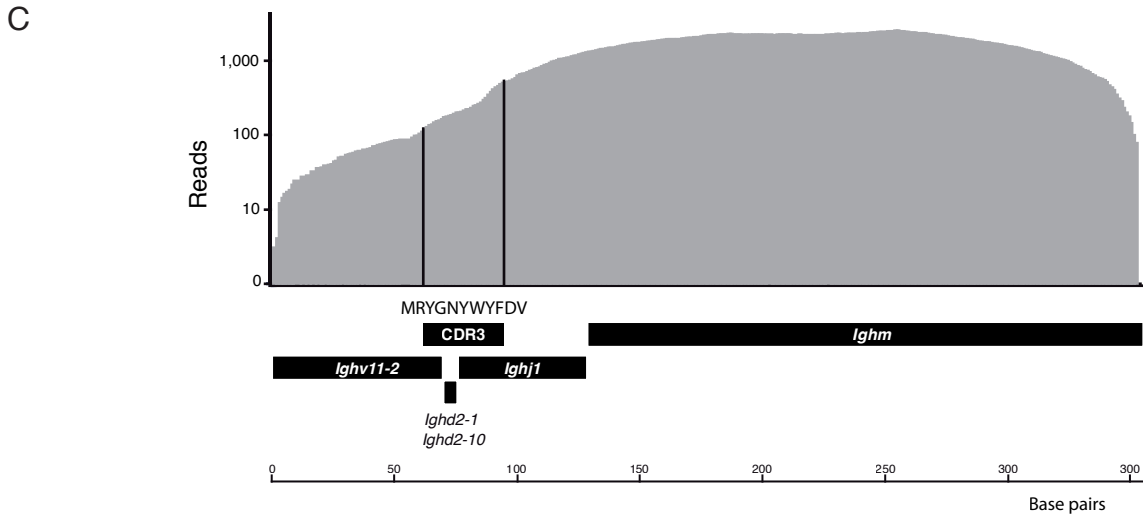

**D** *Ighv* genes encoding in-frame CDR3 peptides

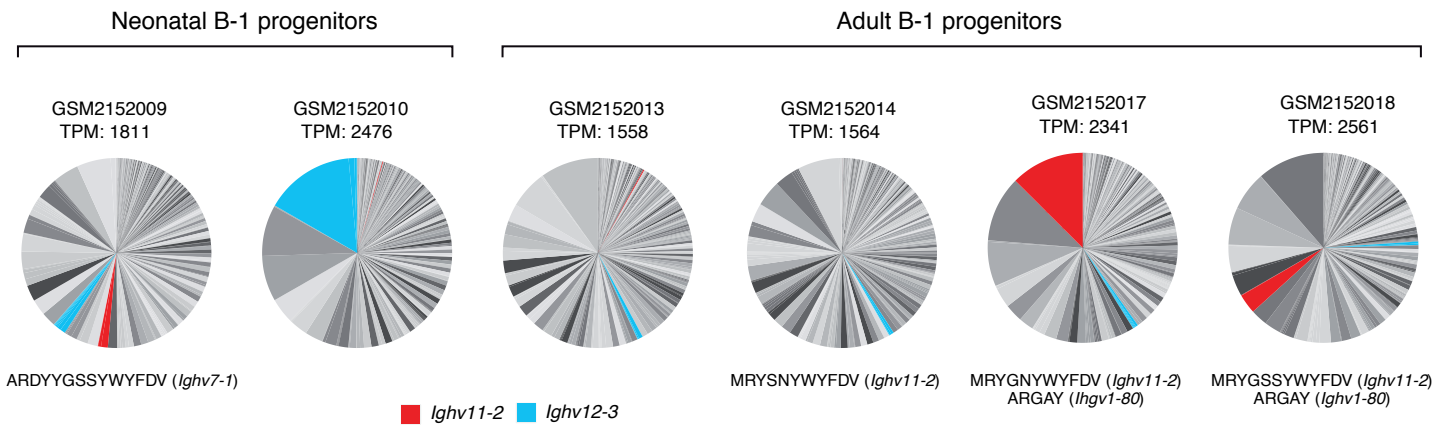

**E** *Ighkv* genes encoding in-frame CDR3 peptides

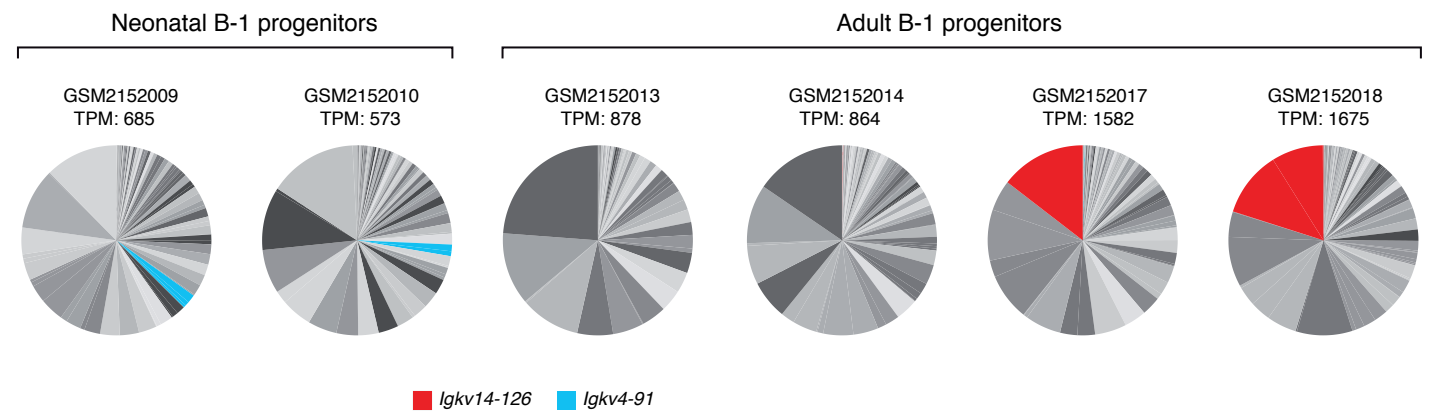

Supplement: NIHMS934113-supplement-1.pdf [file NIHMS934113-supplement-1.pdf]
